# Supplementary material for: Structure of cyclin G-associated kinase (GAK) trapped in different conformations using nanobodies
Source: Oxford University Press journal article supplement (doi:10.1042/bj20131399), 2014-01-20
Supplement: bj4590059add.pdf [file bj4590059add.pdf]

## SUPPLEMENTARY ONLINE DATA

# Structure of cyclin G-associated kinase (GAK) trapped in different conformations using nanobodies

Apirat CHAIKUAD<sup>\*1</sup>, Tracy KEATES<sup>\*1</sup>, Cécile VINCKE<sup>†</sup>, Melanie KAUFHOLZ<sup>‡</sup>, Michael ZENN<sup>§</sup>, Bastian ZIMMERMANN<sup>§</sup>, Carlos GUTIÉRREZ<sup>¶</sup>, Rong-guang ZHANG<sup>||</sup>, Catherine HATZOS-SKINTGES<sup>||</sup>, Andrzej JOACHIMIAK<sup>||</sup>, Serge MUYLDERMANS<sup>†</sup>, Friedrich W. HERBERG<sup>‡§</sup>, Stefan KNAPP<sup>\*</sup> and Susanne MÜLLER<sup>\*2</sup>

<sup>\*</sup>University of Oxford, Target Discovery Institute (TDI) and Structural Genomics Consortium (SGC), Old Road Campus Research Building, Oxford OX3 7DQ, U.K.

<sup>†</sup>Research Unit of Cellular and Molecular Immunology and Department of Structural Biology, VIB, Vrije Universiteit Brussel, Pleinlaan 2, 1050 Brussels, Belgium

<sup>‡</sup>Department of Biochemistry, University of Kassel, Heinrich-Plett Strasse 40, 34132 Kassel, Germany

<sup>§</sup>Biaffin GmbH & CoKG, Heinrich-Plett Strasse 40, 34132 Kassel, Germany

<sup>¶</sup>Department of Animal Medicine and Surgery, Veterinary Faculty, University of Las Palmas de Gran Canaria, 35416, Arucas, Las Palmas, Spain

<sup>||</sup>Midwest Center for Structural Genomics and Structural Biology Center, Biosciences Division, Argonne National Laboratory, 9700 South Cass Avenue, Argonne, IL 60439, U.S.A.

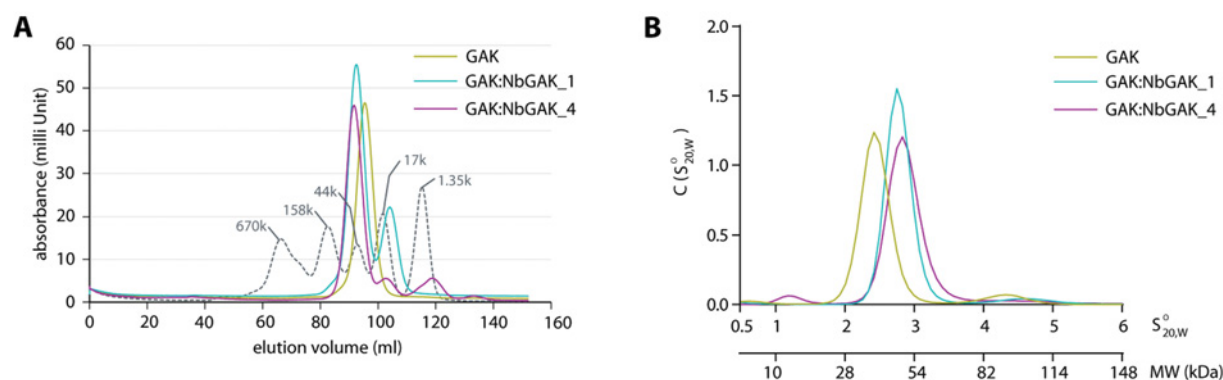

**Figure S1 Monomeric GAK in solution**

(A) Size-exclusion chromatography profiles of the GAK and Nb complexes performed on Superdex S200 column. (B) Sedimentation velocity AUC of the GAK and Nb complexes performed at 98 607 *g* using a protein concentration of ~20  $\mu$ M. The peak at 1.2 S corresponds to the free Nb; the kinase domain has a sedimentation coefficient of 2.5S and the kinase Nb complexes sediment around 3S. Some dimerization is obvious at 4.5S.

<sup>1</sup> These authors contributed equally to the work.

<sup>2</sup> To whom correspondence should be addressed (email susanne.muller-knapp@sgc.ox.ac.uk).

The crystal structures reported in this paper have been deposited in the PDB under codes 4O38, 4C57, 4C58 and 4C59.

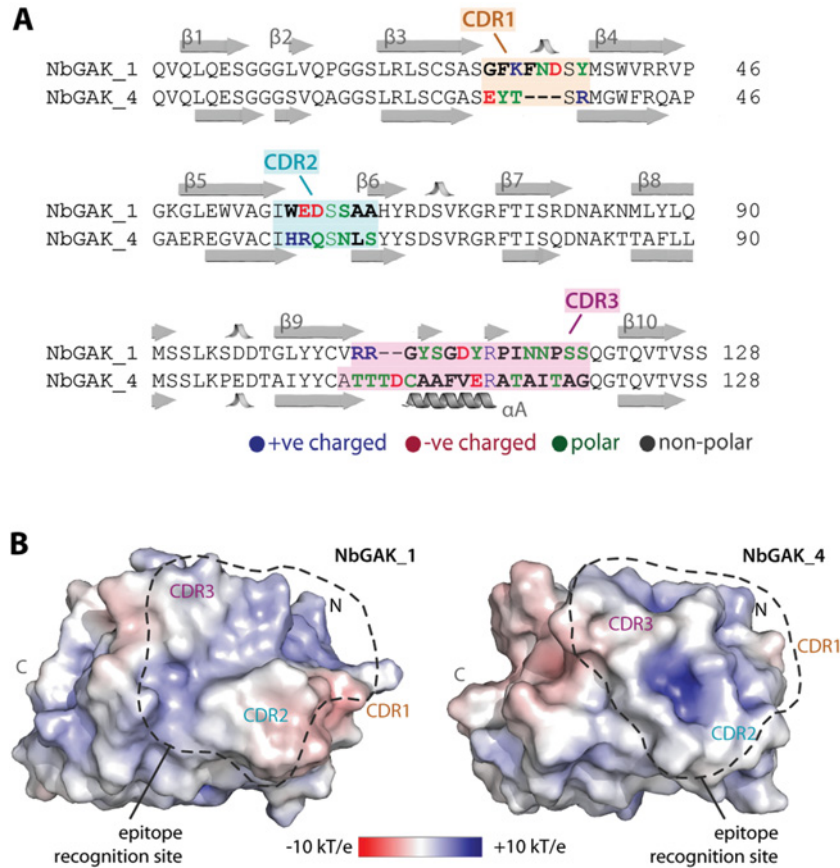

**Figure S2 Details of structural comparison of NbGAK\_1 and NbGAK\_4**

(A) Structure-based sequence alignment with their corresponding secondary structures annotated. High amino acid variations are observed for the three variable CDRs, and are coloured according to charge properties. NbGAK\_4 has a shorter than normal CDR1 (H1). Highest sequence variation is found in CDR3 (H3), where a stretch of hydrophobic amino acids results in a helical segment ( $\alpha A$ ) for NbGAK\_4 compared with a short anti-parallel two-stranded  $\beta$ -sheet insertion for NbGAK\_1. (B) Surface representation and electrostatic potentials demonstrate distinct architectures of the epitope-recognition sites between the two Nbs. The GAK-binding site of NbGAK\_4 is defined by a surface-filled non-charged interaction site with positively charged pockets spreading along the CDR surface. In contrast the epitope-binding site of NbGAK\_1 forms a shallow groove between the CDR3 on one side and CDR1 and CDR2 on the other side, and exhibits a broad positively charged electrostatic surface. Calculation of solvent-accessible area using the PISA server revealed a slightly larger contact surface on GAK ( $692 \text{ \AA}^2$ ) for the NbGAK\_1 interaction, compared with the  $578 \text{ \AA}^2$  surface area needed for tight complex formation with NbGAK\_4.

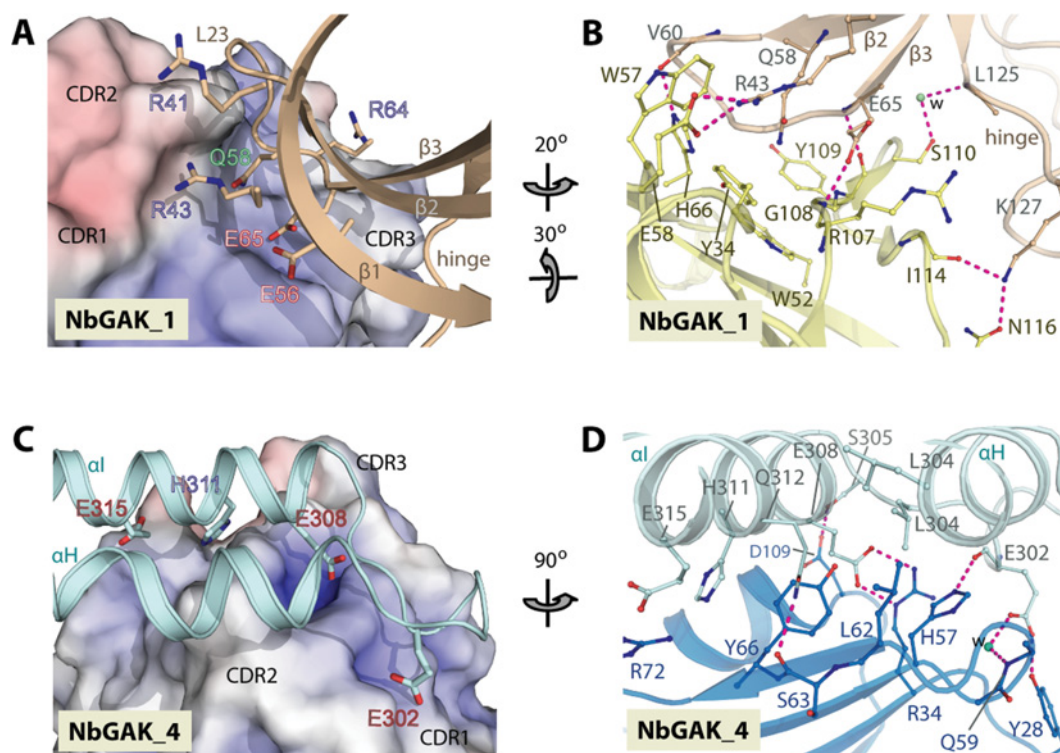

**Figure S3 Intermolecular interaction between GAK and Nbs**

Surface representation of the Nbs reveals shape and electrostatic complementarities between their epitopes and CDRs, which distinguish the binding sites of NbGAK\_1 (**A**) and NbGAK\_4 (**C**) on to the kinase. Local intermolecular contacts including hydrogen bonds (distance  $< 3.2$  Å) and salt bridges between the kinase and NbGAK\_1 (**B**) and NbGAK\_4 (**D**) are represented by broken lines. Some interactions are mediated by water molecules, which are shown as green spheres.

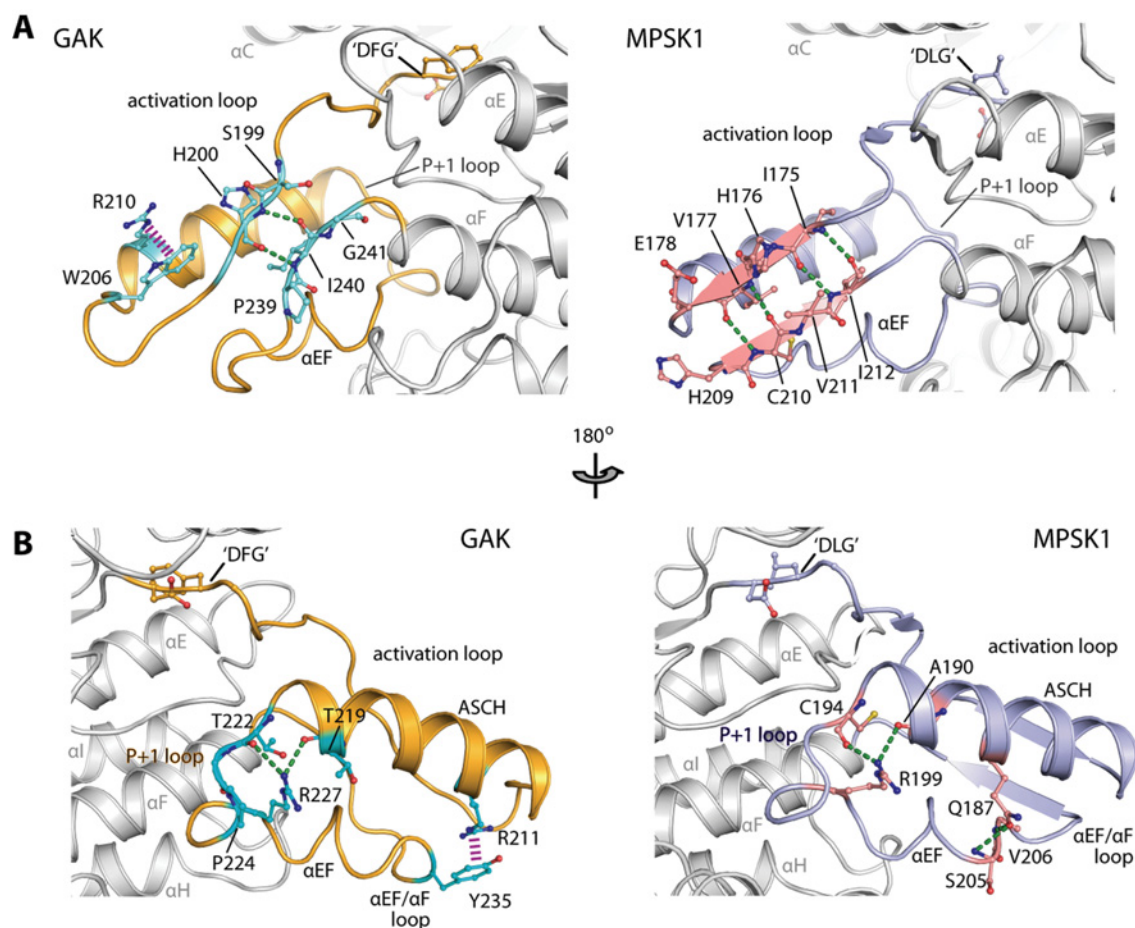

**Figure S4 Stabilizing interactions of the active conformation of the activation segment in GAK**

Comparison of detailed interactions between residues of GAK (left-hand panel) and MPSK1 (right-hand panel) within the activation loop (**A**) and the ASCH segment (**B**) of the active conformation of the activation segments.

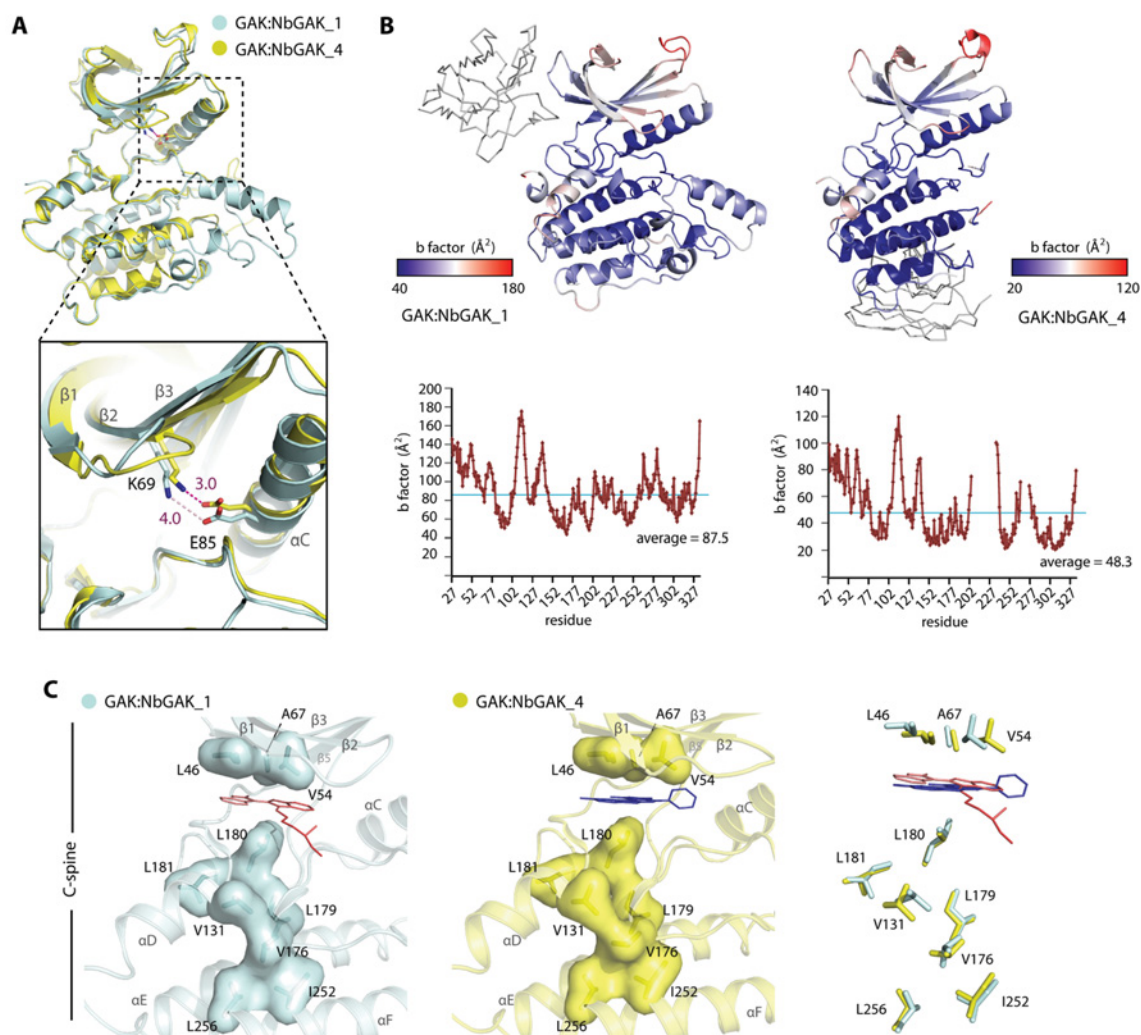

**Figure S5 NbGAK\_1 distorted the GAK N-lobe and its overall stability**

(A) Superimposition between GAK molecules from two Nb complexes reveals a distorted relatively open N-lobe in the GAK–NbGAK\_1 complex that restricts salt bridge formation. (B) Cartoon representations with colour mapping of temperature (B-) factors on the kinase. In addition to the N-lobe, the C-lobe of GAK in the NbGAK\_1-complexed structure showed a higher degree of flexibility compared with that of the kinase in the GAK–NbGAK\_4 complex. (C) Comparison of the residue compositions of the C-spine in both complexes. Slight shifts in the positions of some residues are observed between the two structures (right-hand panel).



**Table S1 Data collection and refinement statistics**

Values in parentheses are for the highest-resolution shells. P/L/O, protein, ligand molecules and other (water and solvent molecules).

| Complex                                  | Apo-GAK                                                          |                        | GAK-NbGAK_1 indirubin E804                                                                  | GAK-NbGAK_4 Wee1/Chk1                     | GAK-NbGAK_4 indirubin E804               |
|------------------------------------------|------------------------------------------------------------------|------------------------|---------------------------------------------------------------------------------------------|-------------------------------------------|------------------------------------------|
| PDB code                                 | 4O38                                                             |                        | 4C57                                                                                        | 4C58                                      | 4C59                                     |
| Data collection                          | Inflection                                                       | Peak                   |                                                                                             |                                           |                                          |
| Beamline                                 | APS 19-ID                                                        | APS 19-ID              | Diamond, I02                                                                                | Diamond, I04                              | Diamond, I04                             |
| Wavelength (Å)                           | 0.9794                                                           | 0.9791                 | 0.9795                                                                                      | 1.0121                                    | 1.0121                                   |
| Resolution (Å)                           | 50–2.22 (2.26–2.22)                                              | 74.11–2.10 (2.14–2.10) | 83.39–2.55 (2.69–2.55)                                                                      | 45.09–2.16 (2.28–2.16)                    | 19.75–2.80 (2.95–2.80)                   |
| Space group                              | $P3_221$                                                         | $P3_221$               | $P2_1$                                                                                      | $C2$                                      | $C2$                                     |
| Cell dimensions<br>$a, b, c$ (Å)         | 103.6, 103.6, 132.1                                              | 103.4, 103.4, 132.0    | 75.2, 86.7, 83.9                                                                            | $a = 156.9, b = 37.4, c = 76.0$ Å         | $a = 174.3, b = 37.8, c = 75.6$ Å        |
| $\alpha, \beta, \gamma$ (°)              | 90.0, 90.0, 120.0                                                | 90.0, 90.0, 120.0      | 90.0, 96.4, 90.0                                                                            | 90.0, 108.5, 90.0                         | 90.0, 111.5, 90.0                        |
| Number of unique reflections             | 41031 (1,999)                                                    | 48311 (2356)           | 34717 (4842)                                                                                | 22748 (3292)                              | 11580 (1678)                             |
| Completeness (%)                         | 99.9 (100)                                                       | 99.9 (100.0)           | 99.1 (95.1)                                                                                 | 99.2 (99.7)                               | 99.5 (99.8)                              |
| $I/\sigma I$                             | 41.3 (4.1)                                                       | 36.6 (2.2)             | 10.5 (2.1)                                                                                  | 10.3 (2.0)                                | 8.3 (2.0)                                |
| $R_{\text{merge}}$ (%)                   | 7.3 (75.7)                                                       | 8.2 (95.7)             | 9.1 (64.1)                                                                                  | 10.9 (77.7)                               | 14.1 (69.1)                              |
| Redundancy                               | 14.5 (14.7)                                                      | 14.5 (14.0)            | 5.2 (3.5)                                                                                   | 5.7 (5.7)                                 | 3.6 (3.7)                                |
| Phasing                                  | MAD                                                              | MAD                    | Molecular replacement                                                                       | Molecular replacement                     | Molecular replacement                    |
| Resolution (Å)                           | 74.11–2.1                                                        | 74.11–2.1              |                                                                                             |                                           |                                          |
| Phasing power                            | 1.32                                                             | 1.32                   |                                                                                             |                                           |                                          |
| Figure of merit                          |                                                                  |                        |                                                                                             |                                           |                                          |
| Acentric/centric                         | 0.84/0.8                                                         | 0.84/0.8               |                                                                                             |                                           |                                          |
| After density modification               | 0.92                                                             | 0.92                   |                                                                                             |                                           |                                          |
| Refinement                               |                                                                  |                        |                                                                                             |                                           |                                          |
| Number of atoms in refinement (P/L/O)    |                                                                  | 4314/–/282             | 6676/54/223                                                                                 | 3020/25/206                               | 2976/27/63                               |
| $R_{\text{fact}}$ (%)                    |                                                                  | 16.5                   | 17.8                                                                                        | 17.9                                      | 20.2                                     |
| $R_{\text{free}}$ (%)                    |                                                                  | 19.5                   | 22.8                                                                                        | 24.2                                      | 26.2                                     |
| $B_{\text{f}}$ (P/L/O) (Å <sup>2</sup> ) |                                                                  | 57/–/56                | 80/78/62                                                                                    | 44/34/45                                  | 61/70/41                                 |
| RMSD bond (Å)                            |                                                                  | 0.016                  | 0.010                                                                                       | 0.014                                     | 0.008                                    |
| RMSD angle (°)                           |                                                                  | 1.6                    | 1.1                                                                                         | 1.6                                       | 1.0                                      |
| MolProbity                               |                                                                  |                        |                                                                                             |                                           |                                          |
| Ramachandran favour (%)                  |                                                                  | 96.6                   | 96.7                                                                                        | 96.1                                      | 97.6                                     |
| Ramachandran allowed (%)                 |                                                                  | 100.0                  | 100.0                                                                                       | 100.0                                     | 100.0                                    |
| Crystallization                          | 1.0 M succinic acid (pH 7.0) and 0.1 M Bis-Tris propane (pH 7.0) |                        | 14% PEG 3350, 0.2 M sodium sulfate, 0.1 M Bis-Tris propane (pH 7.0) and 10% ethylene glycol | 12% PEG 3350 and 0.13 M magnesium formate | 9% PEG 3350 and 0.06 M magnesium formate |

Received 22 October 2013/16 January 2014; accepted 17 January 2014

Published as BJ Immediate Publication 17 January 2014, doi:10.1042/BJ20131399
